# Supplementary material
Source: PubMed Central journal article supplement (PMC8647033)
Supplement: NIHMS1688401-supplement-1.pdf [file NIHMS1688401-supplement-1.pdf]

**Supplementary Figure 1. Study Timeline.**

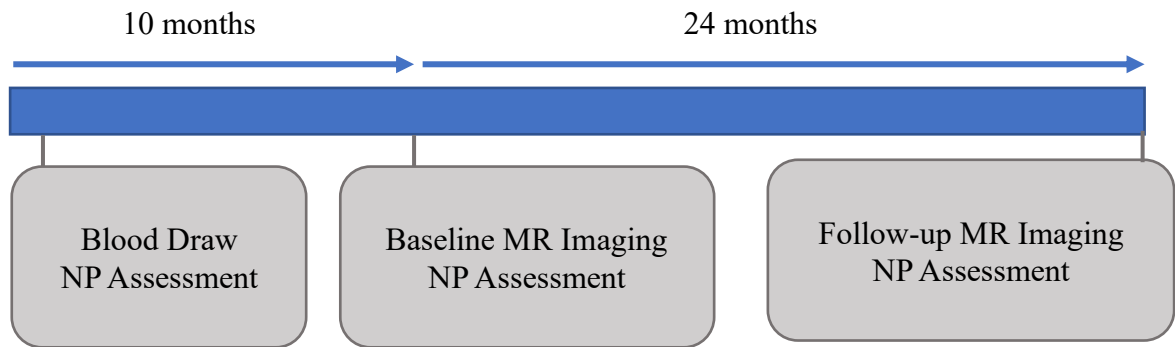

*Abbreviations:* NP = Neuropsychological; MR = Magnetic Resonance
